# Supplementary material
Source: publisher site journal article supplement (https://www.dovepress.com/article/545700)
Supplement: Supplementary file 1 [file Supplementary%20Materials_1_1.doc]

**Supplementary Table 1** Diagnostic accuracy of the FC-48w score in predicting HBsAg seroclearance after Peg-IFN-based therapy in patients with HBeAg-negative CHB

| Patients set | Cut-off points | No. | HBsAg seroclearance | No HBsAg seroclearance | Sensitivity | Specificity | PPV | NPV |
| --- | --- | --- | --- | --- | --- | --- | --- | --- |
| Development cohort |  | 229 | 41 | 188 |  |  |  |  |
|  | ≤ -2.7 | 96 | 4 | 92 |  |  |  |  |
|  | > -2.7 | 133 | 37 | 96 | 90.24% | 48.94% | 27.82% | 95.83% |
|  | ≤ -1.3 | 180 | 17 | 163 |  |  |  |  |
|  | > -1.3 | 49 | 24 | 25 | 58.54% | 86.70% | 48.98% | 90.56% |
| Validation cohort |  | 148 | 30 | 118 |  |  |  |  |
|  | ≤ -2.7 | 73 | 2 | 71 |  |  |  |  |
|  | > -2.7 | 75 | 28 | 47 | 93.33% | 60.17% | 37.33% | 97.26% |
|  | ≤ -1.3 | 128 | 19 | 109 |  |  |  |  |
|  | > -1.3 | 20 | 11 | 9 | 36.67% | 92.37% | 55.00% | 85.16% |

**Notes:**

**Abbreviations:** HBsAg, hepatitis B surface antigen; HBeAg, hepatitis B e antigen; CHB, chronic hepatitis B; PPV, positive-predictive value; NPV, negative-predictive value

**Supplementary Table 2** Stratification of incidence rate of HBsAg seroclearance after Peg-IFN-based therapy in patients with HBeAg-negative CHB

| Group | FC-48w score | Incidence rate of HBsAg seroclearance (%) | | |
| --- | --- | --- | --- | --- |
| Development cohort | Validation cohort | Entire cohort |
| Low probability group | ≤ -2.7 | 4.17% | 2.74% | 3.55% |
| Intermediate probability group | > -2.7 to ≤ -1.3 | 15.48% | 30.91% | 21.58% |
| High probability group | > -1.3 | 48.98% | 55.00% | 50.72% |

**Notes:**

**Abbreviations:** HBsAg, hepatitis B surface antigen; CHB, chronic hepatitis B; HBeAg, hepatitis B e antigen

**Supplementary Figures**

**
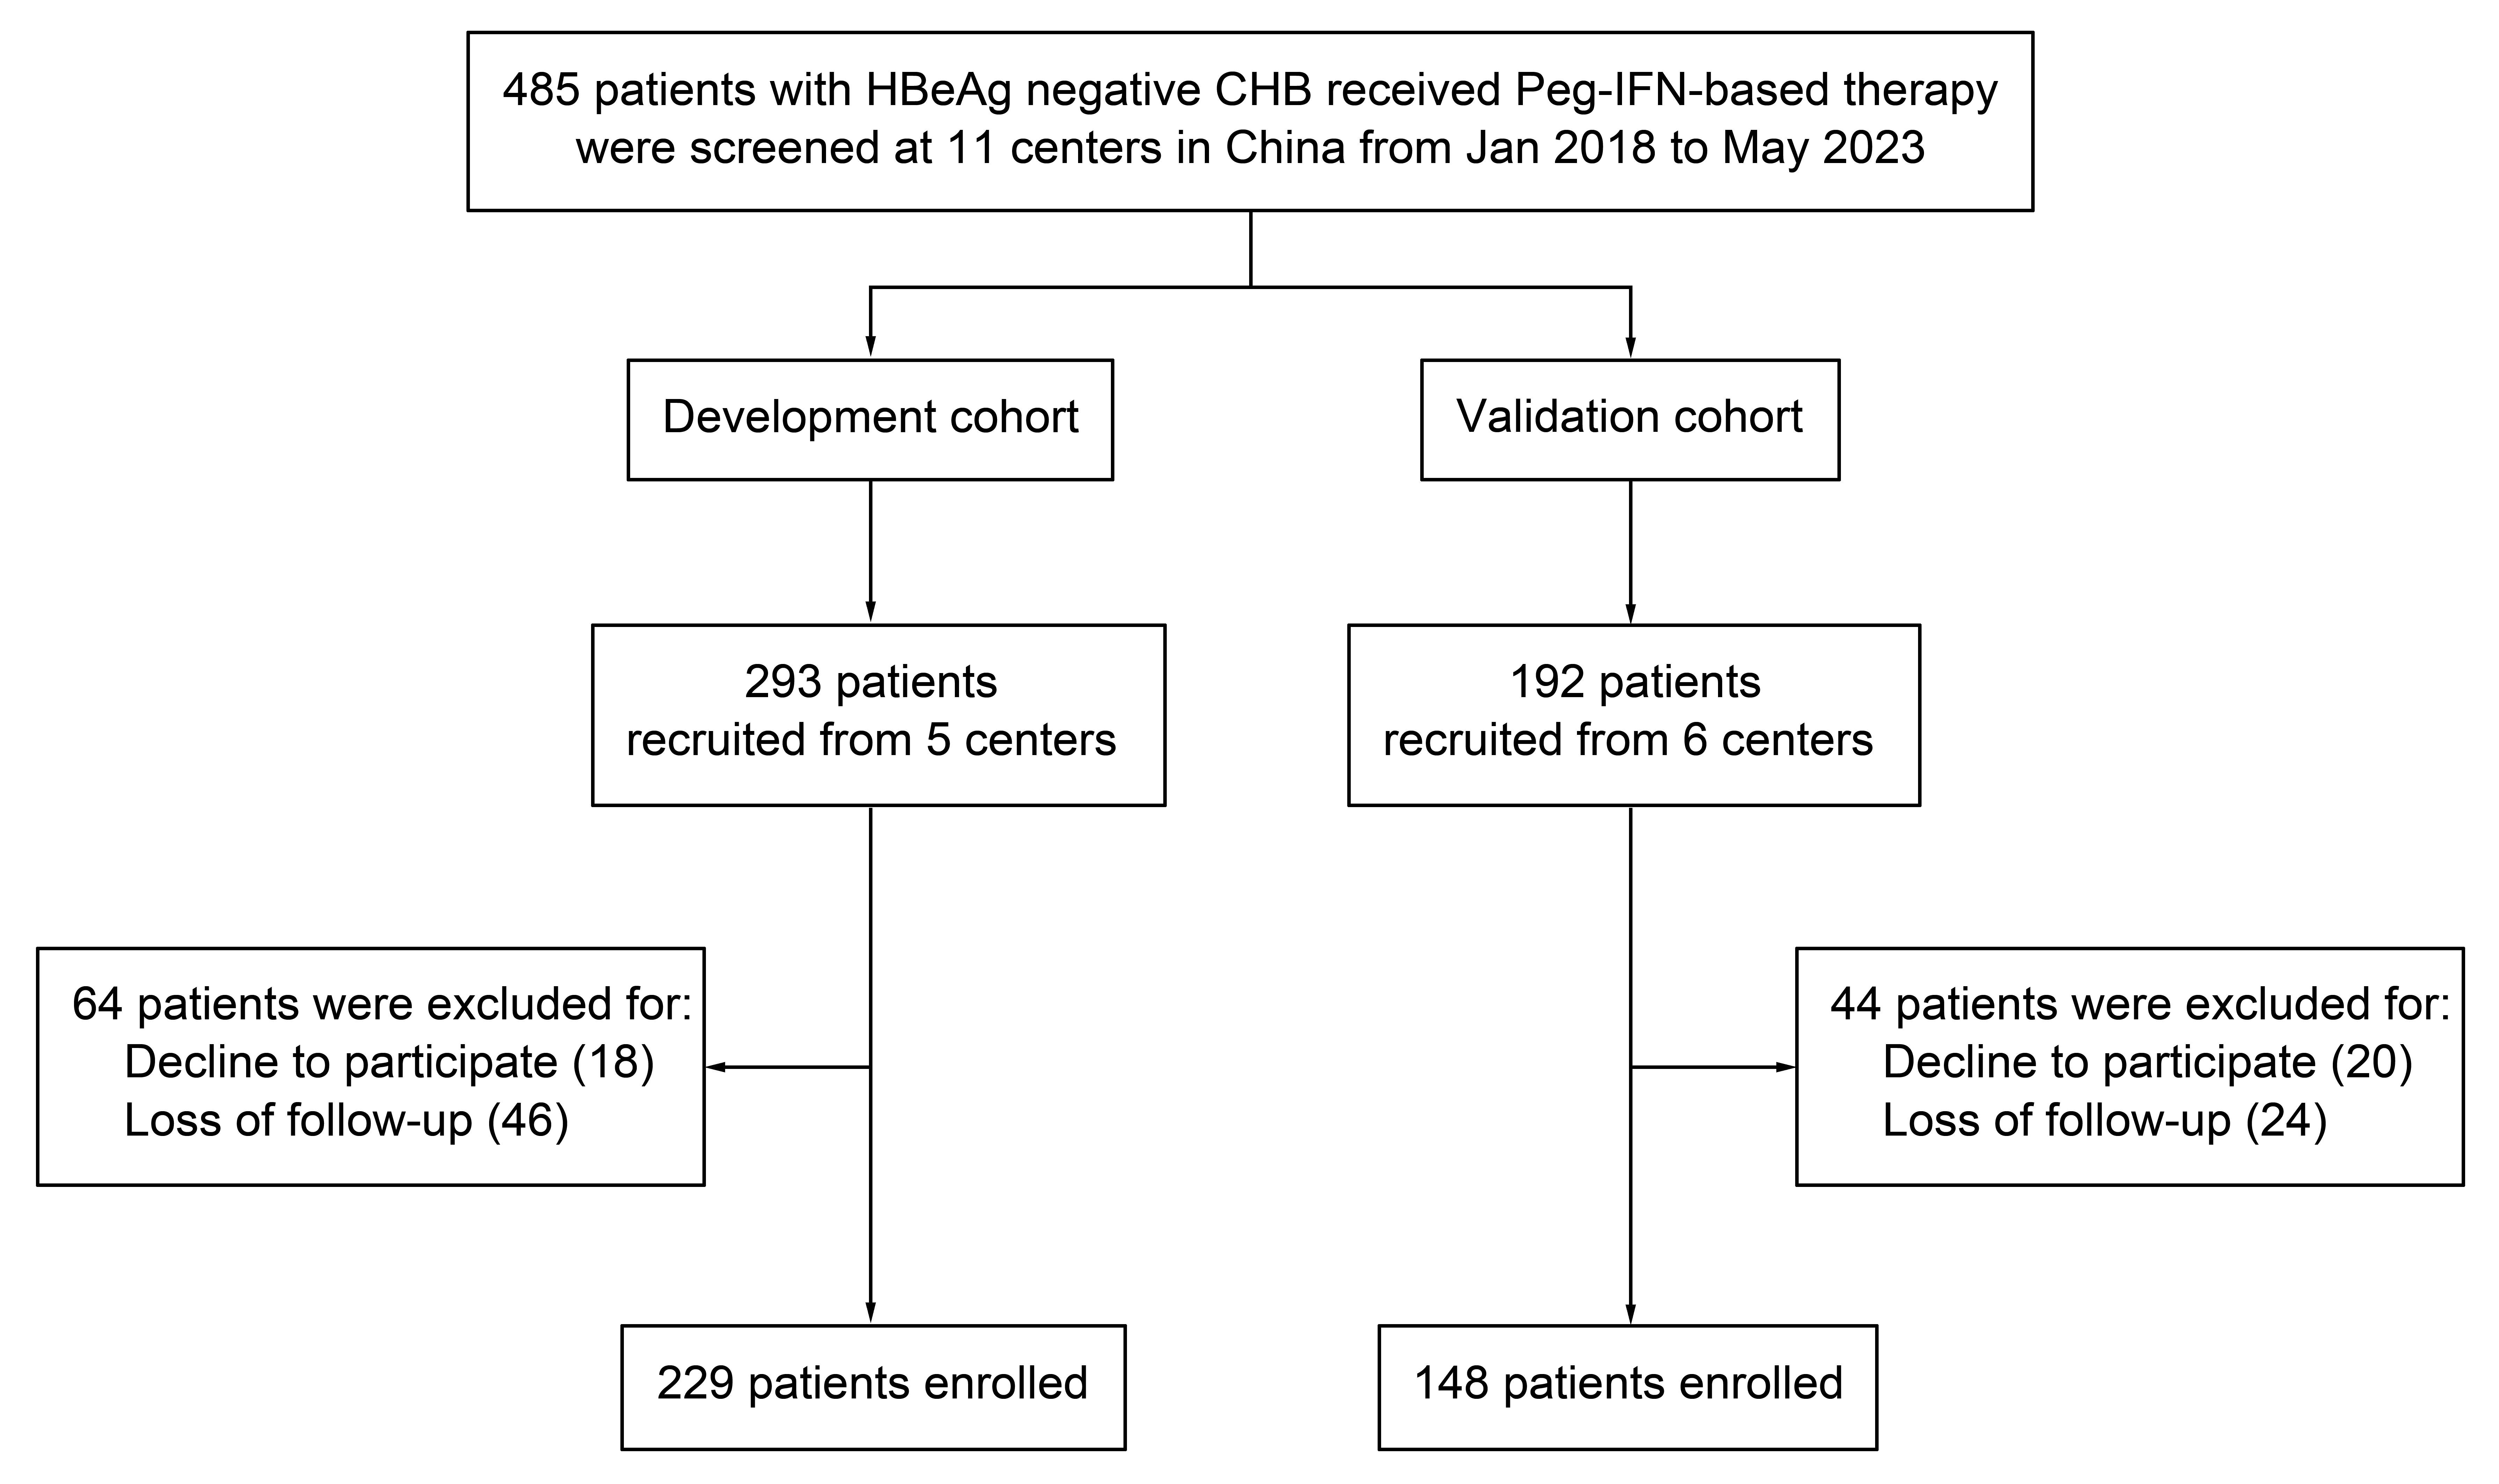
**

**Supplementary figure 1** Flow diagram depicting the patients’ selection process

**
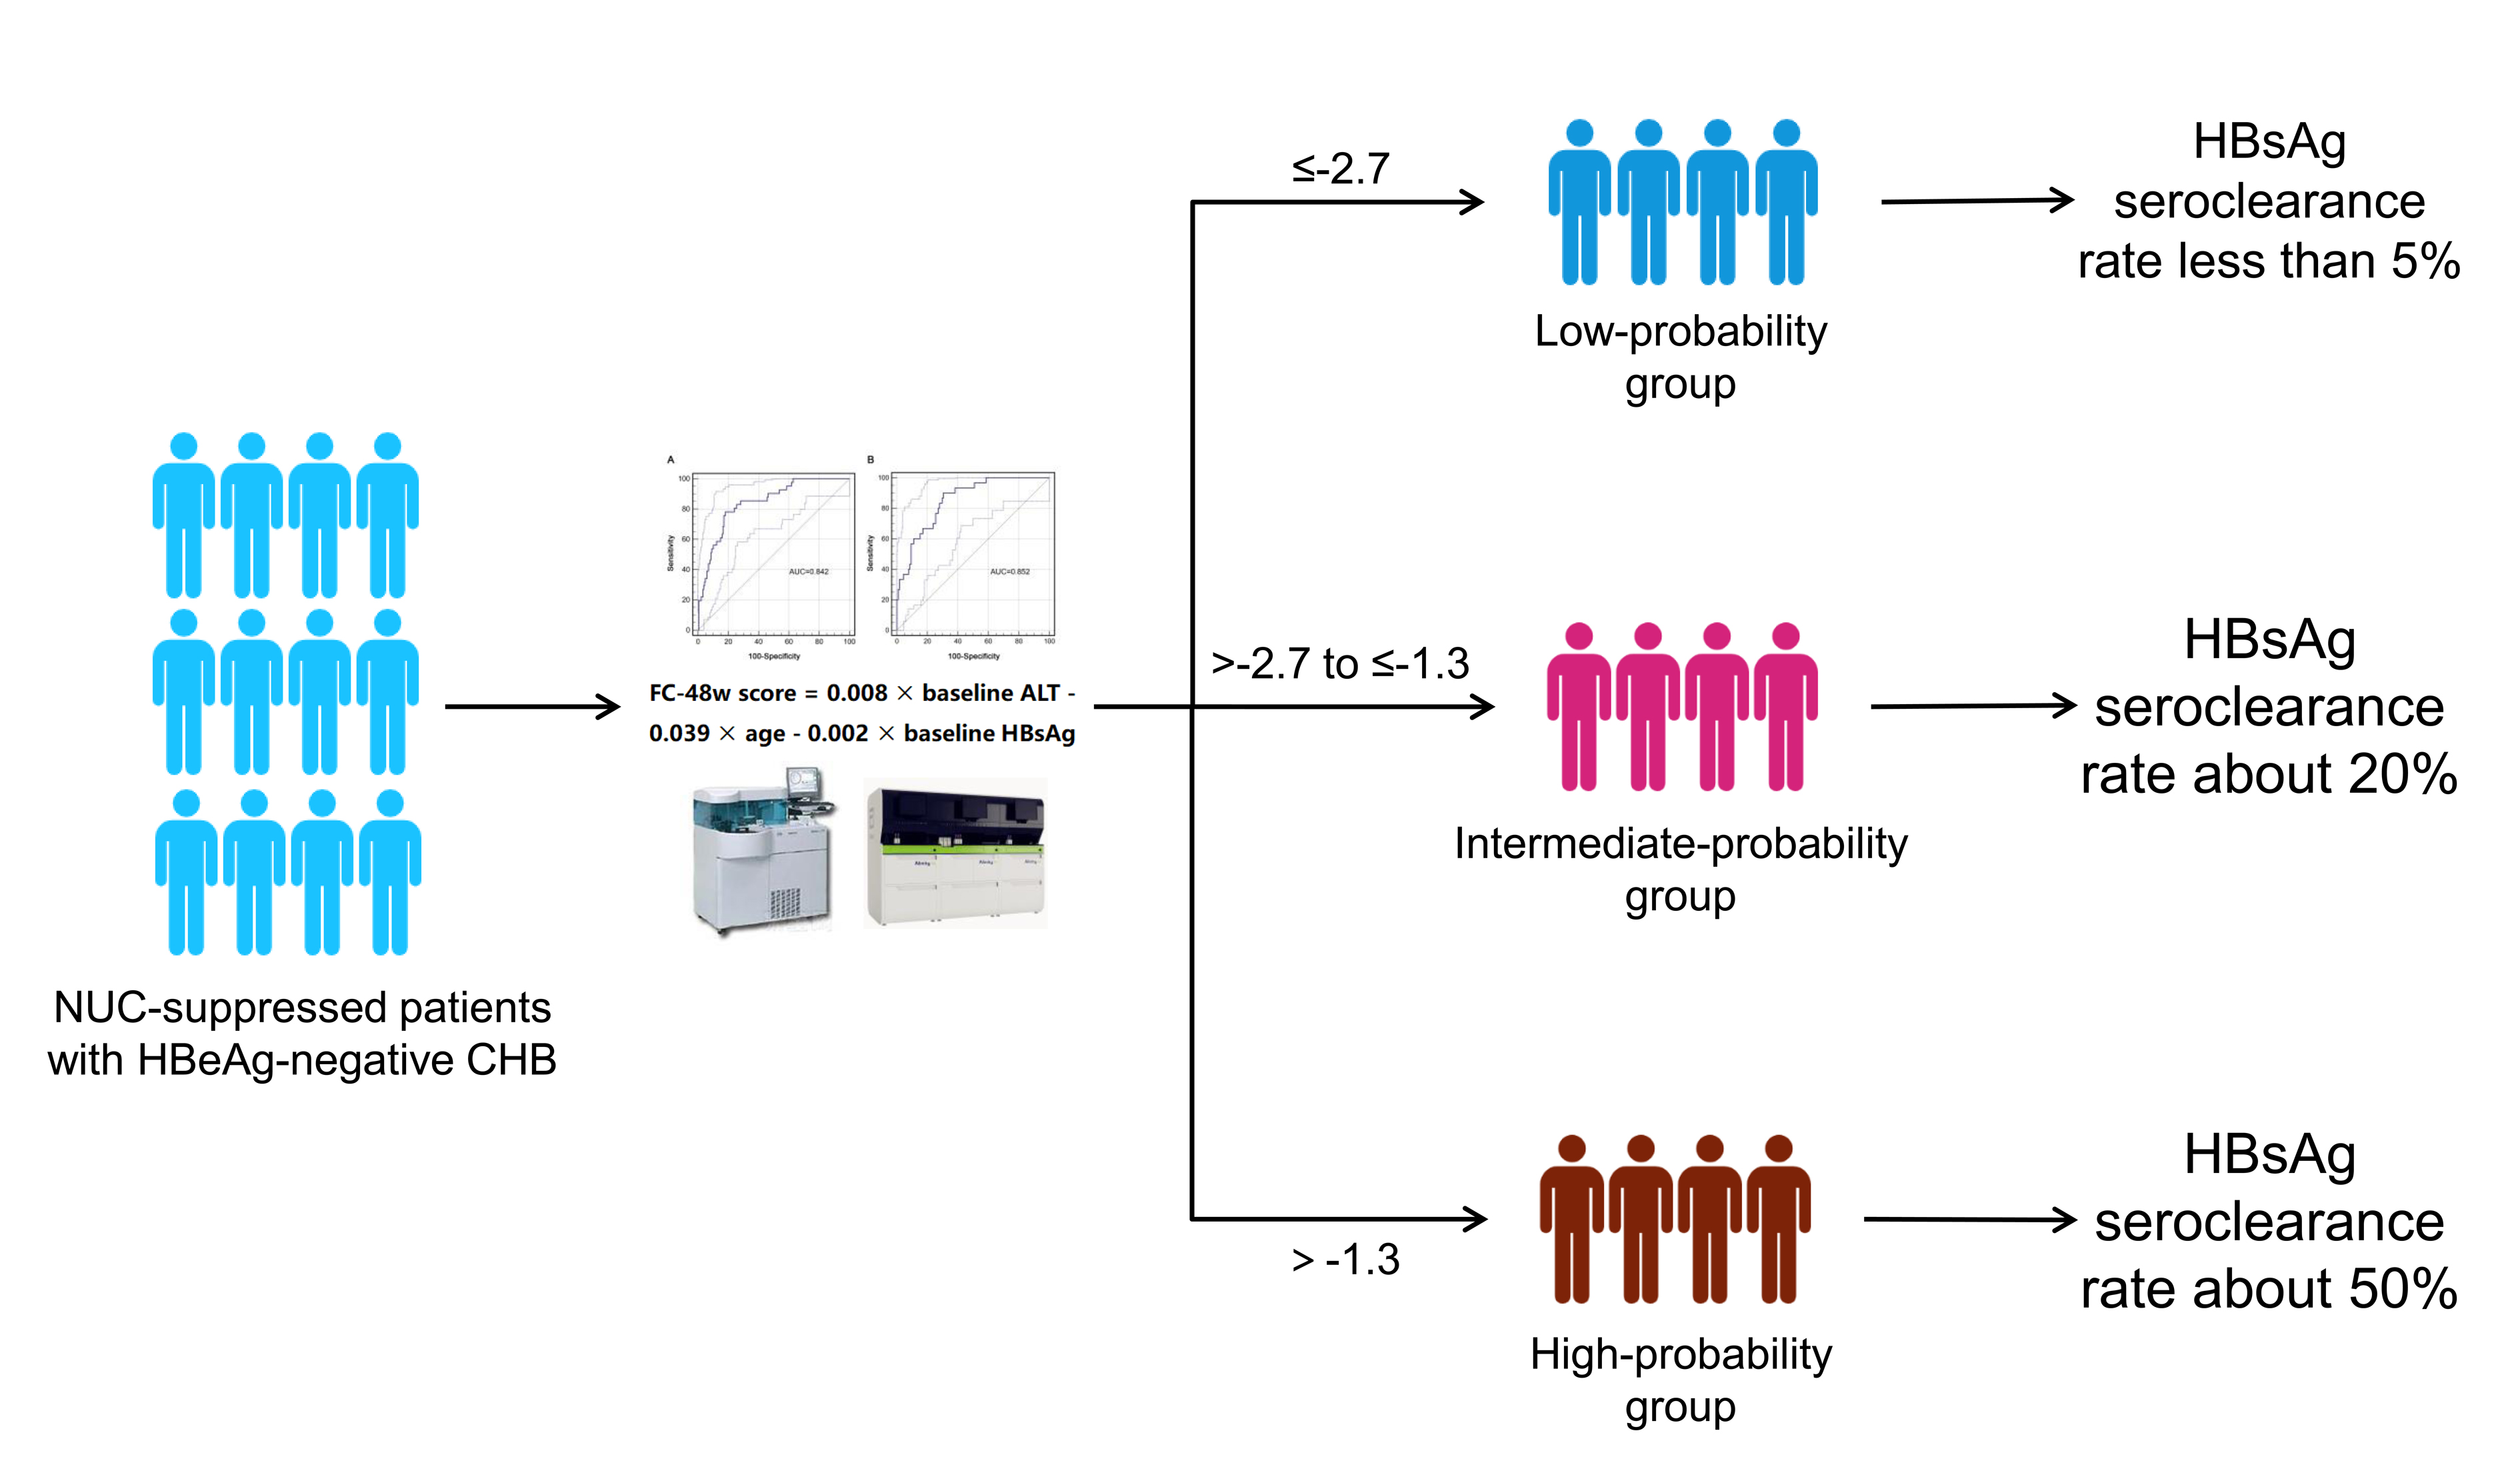
**

**Supplementary figure 2** Algorithm for the application of FC-48w score in predicting HBsAg seroclearance after Peg-IFN-based therapy in virally-suppressed patients with HBeAg-negative CHB
